# Supplementary material for: Expression of the SIBLINGs and their MMP partners in human benign and malignant prostate neoplasms
Source: PubMed Central journal article supplement (PMC5216998; doi:10.18632/oncotarget.10110), 2016-06-16
Supplement: oncotarget-07-48038-s001.pdf [file oncotarget-07-48038-s001.pdf]

## Expression of the SIBLINGs and their MMP partners in human benign and malignant prostate neoplasms

### SUPPLEMENTARY FIGURE

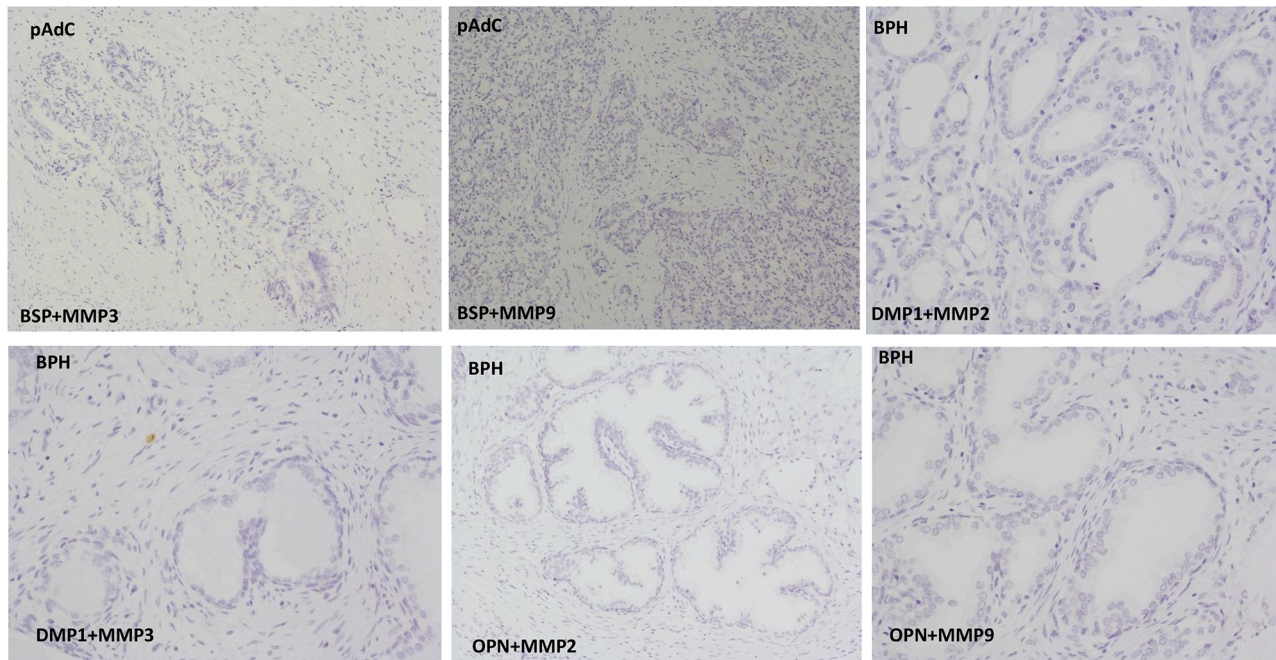

Supplementary Figure S1: iPLA shows negativity in mismatch SIBLING-MMP pairs in prostate neoplasms, compared to result in Figure 5, further validating the specificity of the SIBLING-cognate MMP interaction previously reported in other biologic systems. (Mag. 10X)
